# Supplementary material
Source: MDPI journal article supplement (https://www.mdpi.com/2220-9964/7/10/403)
Supplement: s1 [file s1]

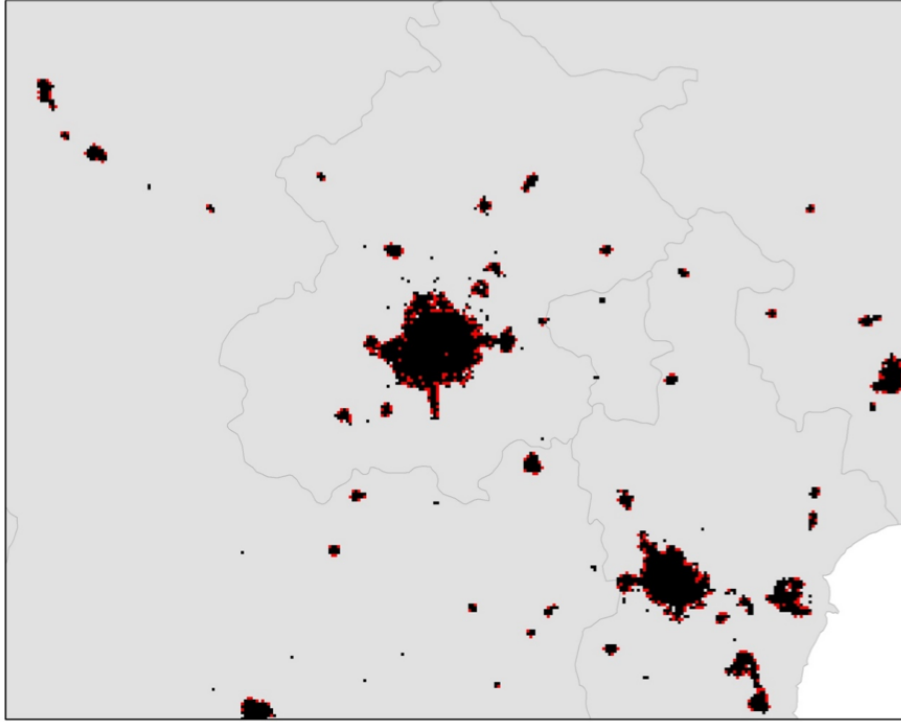

Figure S1a: Simulation with Neighborhood 3\*3; New Changes = 5201 pixels =  $5201km^2$

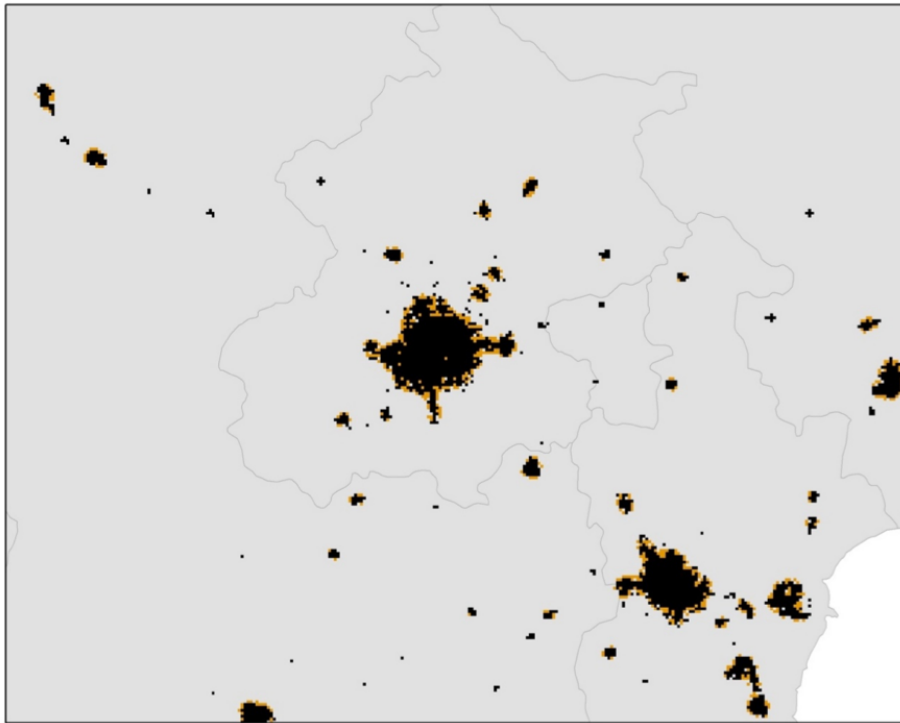

Figure S1b: Simulation with Neighborhood 5\*5; New Changes = 6467 pixels =  $6467km^2$

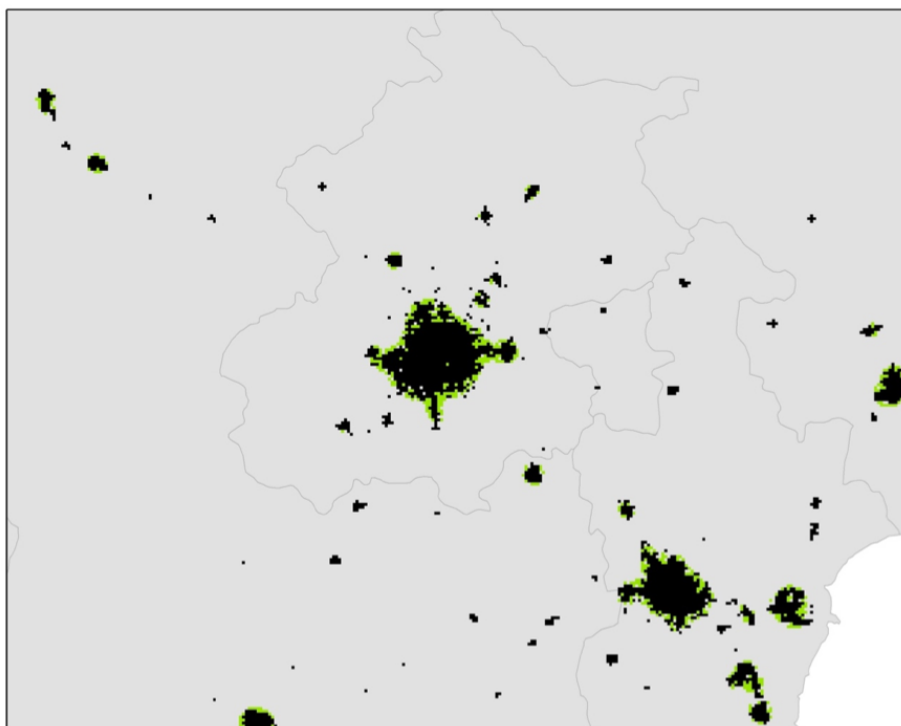

Figure S1c: Simulation with Neighborhood 7\*7; New Changes = 5887 pixels =  $5887km^2$

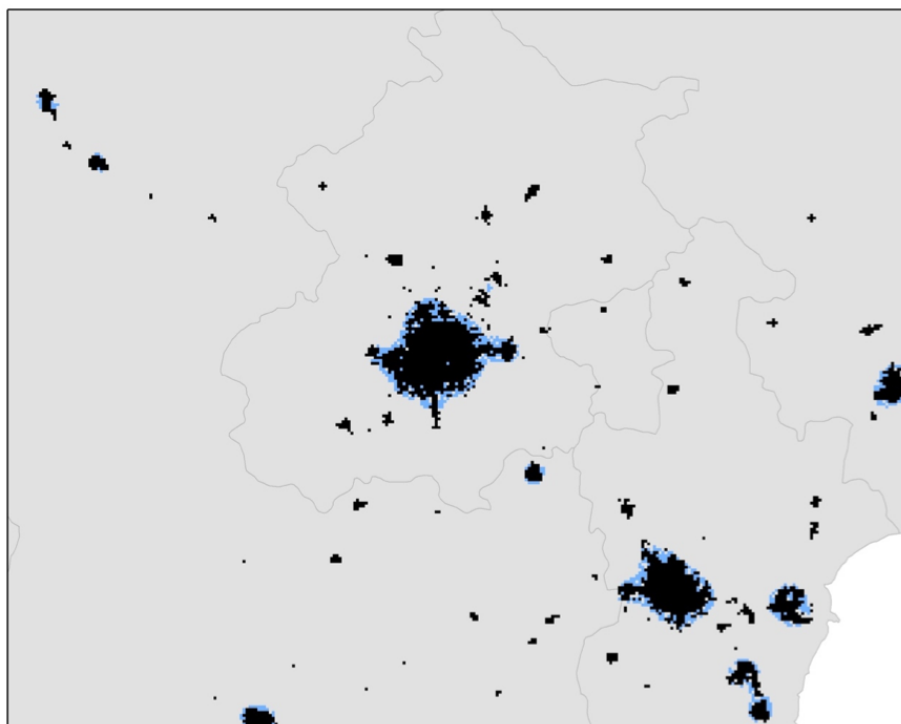

Figure S1d: Simulation with Neighborhood 9\*9; New Changes = 6102 pixels =  $6102km^2$

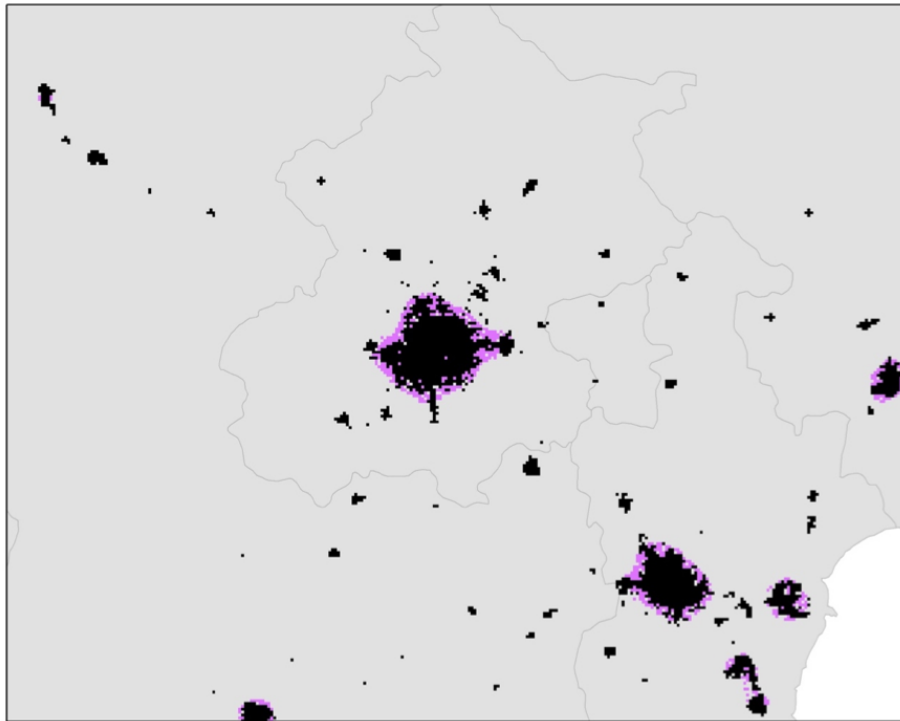

Figure S1e: Simulation with Neighborhood 11\*11; New Changes = 5614 pixels  
= 5614km<sup>2</sup>

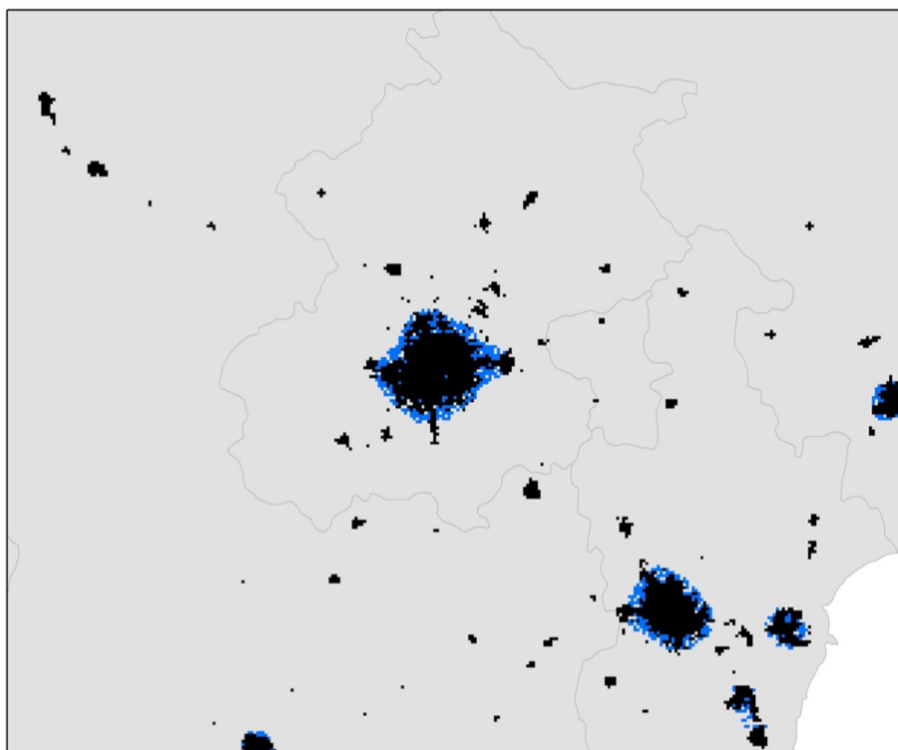

Figure S1f: Simulation with Neighborhood 13\*13; New Changes = 5516 pixels  
= 5516km<sup>2</sup>

**Accuracy Assessment on the model with 3\*3 neighborhood and an urban ratio of 0.25**

| N1P25, stratified equalized |                   |         |         |       |                   |        |
|-----------------------------|-------------------|---------|---------|-------|-------------------|--------|
| OID_                        | <u>ClassValue</u> | C_0     | C_1     | Total | <u>U_Accuracy</u> | Kappa  |
|                             | C_0               | 24978   | 5218    | 30196 | 0.827195655       | 0      |
|                             | C_1               | 22      | 19782   | 19804 | 0.998889113       | 0      |
|                             | Total             | 25000   | 25000   | 50000 | 0                 | 0      |
|                             | <u>P_Accuracy</u> | 0.99912 | 0.79128 | 0     | 0.8952            | 0      |
|                             | Kappa             | 0       | 0       | 0     | 0                 | 0.7904 |

**Accuracy Assessment on the model with 3\*3 neighborhood and an urban ratio of 0.25**

| N2P33, Stratified equalized |                   |         |         |       |                   |         |
|-----------------------------|-------------------|---------|---------|-------|-------------------|---------|
| OID_                        | <u>ClassValue</u> | C_0     | C_1     | Total | <u>U_Accuracy</u> | Kappa   |
|                             | C_0               | 24981   | 5509    | 30490 | 0.819317809       | 0       |
|                             | C_1               | 19      | 19491   | 19510 | 0.99902614        | 0       |
|                             | Total             | 25000   | 25000   | 50000 | 0                 | 0       |
|                             | <u>P_Accuracy</u> | 0.99924 | 0.77964 | 0     | 0.88944           | 0       |
|                             | Kappa             | 0       | 0       | 0     | 0                 | 0.77888 |

**Accuracy Assessment on the model with 7\*7 neighborhood and an urban ratio of 0.3125**

| N3P3125, Stratified Equalized |                   |         |        |       |                   |         |
|-------------------------------|-------------------|---------|--------|-------|-------------------|---------|
| OID_                          | <u>ClassValue</u> | C_0     | C_1    | Total | <u>U_Accuracy</u> | Kappa   |
|                               | C_0               | 24981   | 5790   | 30771 | 0.811835819       | 0       |
|                               | C_1               | 19      | 19210  | 19229 | 0.999011909       | 0       |
|                               | Total             | 25000   | 25000  | 50000 | 0                 | 0       |
|                               | <u>P_Accuracy</u> | 0.99924 | 0.7684 | 0     | 0.88382           | 0       |
|                               | Kappa             | 0       | 0      | 0     | 0                 | 0.76764 |

Figure S2: Accuracy Assessment

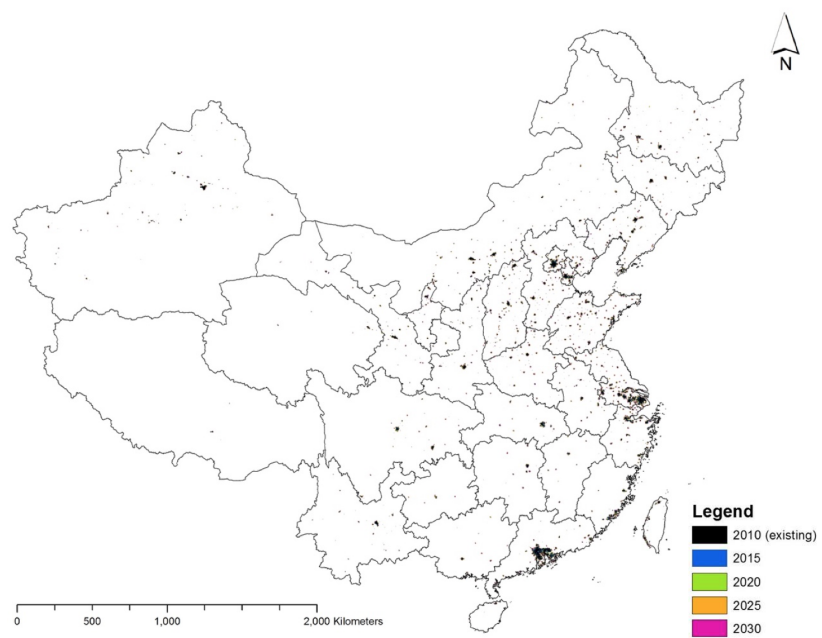

Figure S3: Final urban simulation map
